# Supplementary material for: PEO-Li21Si5 as a pre-lithiation and structural protection layer for lithium-ion batteries
Source: Royal Society of Chemistry journal article supplement (doi:10.1039/d4ta00897a), 2024-01-01
Supplement: d4ta00897a1.pdf [file d4ta00897a1.pdf]

## **PEO-Li<sub>21</sub>Si<sub>5</sub> as a pre-lithiation and structural protection layer for lithium-ion batteries**

Zhiyong Zhang <sup>a</sup>, Zhefei Sun <sup>b</sup>, Shanpeng Pei <sup>c, a</sup>, Yan Liu <sup>d</sup>, Linshan Luo <sup>a</sup>, Shengshi Guo <sup>a</sup>, Xiang Han <sup>e</sup>, Ziqi Zhang <sup>f</sup>, Fuming Wang <sup>a\*</sup>, and Songyan Chen <sup>a\*</sup>

<sup>a</sup> Department of Physics, Collaborative Innovation Center for Optoelectronic Semiconductors and Efficient Devices, Key Laboratory of Low Dimensional Condensed Matter Physics (Department of Education of Fujian Province), Xiamen University, Xiamen 361005, China

<sup>b</sup> State Key Lab of Physical Chemistry of Solid Surfaces, College of Materials, Xiamen University, Xiamen 361005, China

<sup>c</sup> Shandong Electric Power Engineering consulting Institute Corp, Jinan250031, China

<sup>d</sup> School of Semiconductor Science and Technology, South China Normal University, Foshan 528225, China

<sup>e</sup> College of Materials Science and Engineering, Nanjing Forestry University, Nanjing 210037, China

<sup>f</sup> Science and Technology on Analog Integrated Circuit Laboratory, Chongqing 400000, China

\*Corresponding authors

E-mail addresses: [syichen@xmu.edu.cn](mailto:syichen@xmu.edu.cn) (S. Chen), [fumingw@xmu.edu.cn](mailto:fumingw@xmu.edu.cn) (F. Wang)

Keywords: Li<sub>21</sub>Si<sub>5</sub> alloy; pre-lithiation layer; structural protection layer; Si@C anode; lithium-ion batteries

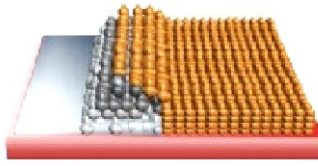

**Spontaneous reaction**

Supplementary Figure 1. Fragmentation process of the  $\text{Li}_{21}\text{Si}_5$  particles.

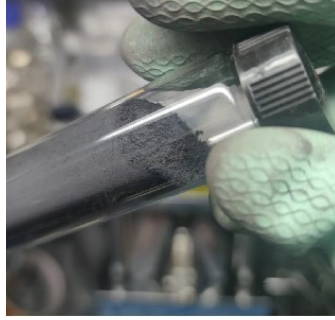

Supplementary Figure 2. Optical Picture of the  $\text{Li}_{21}\text{Si}_5$  powder.

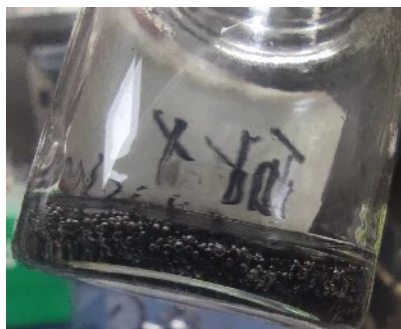

Supplementary Figure 3. Reaction between  $\text{Li}_{21}\text{Si}_5$  and polar solutions.

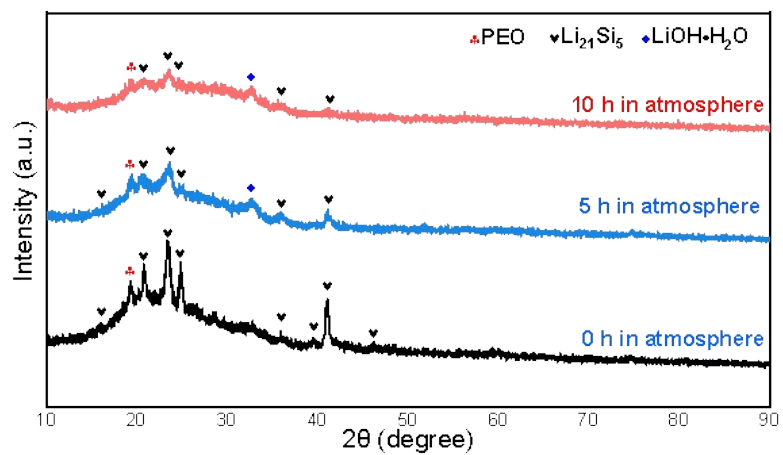

Supplementary Figure 4. XRD data of PEO-Li<sub>21</sub>Si<sub>5</sub> patterns exposure in ambient air (40% humidity).

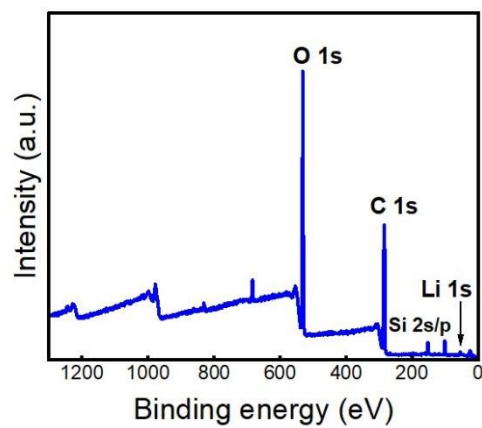

Supplementary Figure 5. XPS full spectrum of PEO-Li<sub>21</sub>Si<sub>5</sub> powder.

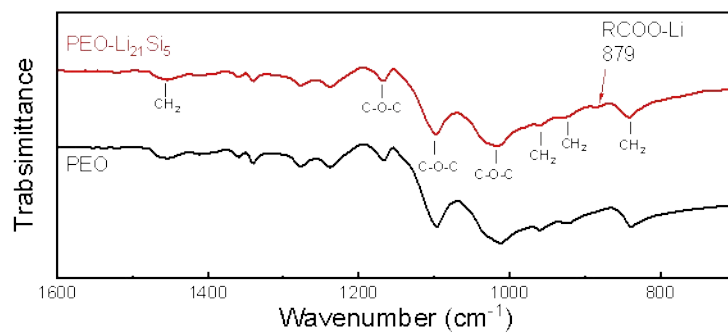

Supplementary Figure 6. FTIR spectra of PEO and  $\text{PEO-Li}_{21}\text{Si}_5$ .

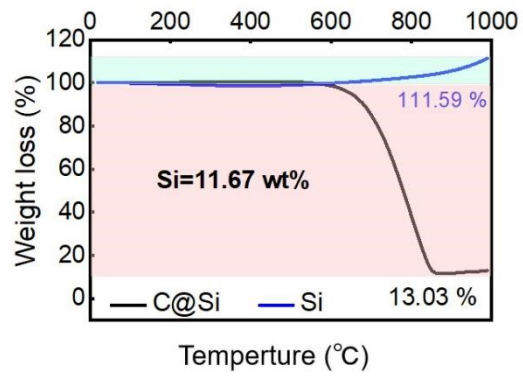

Supplementary Figure 7. Thermogravimetric test of Si@C powder.



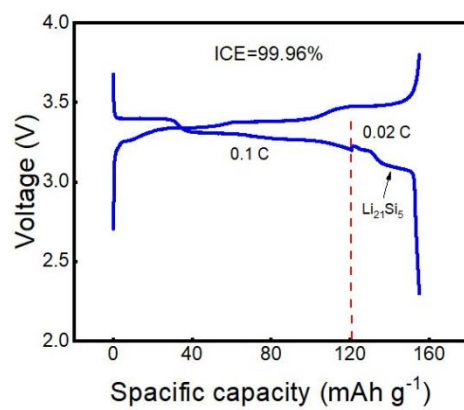

Supplementary Figure 8. First charge/discharge curves of LFP||Si@C/Li<sub>21</sub>Si<sub>5</sub> full-cell at 0.02 C.

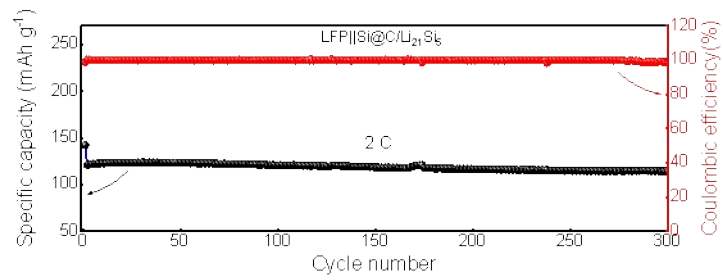

Supplementary Figure 9. long-term cycling test of LFP||Si@C/Li<sub>21</sub>Si<sub>5</sub> full cell at 2 C.

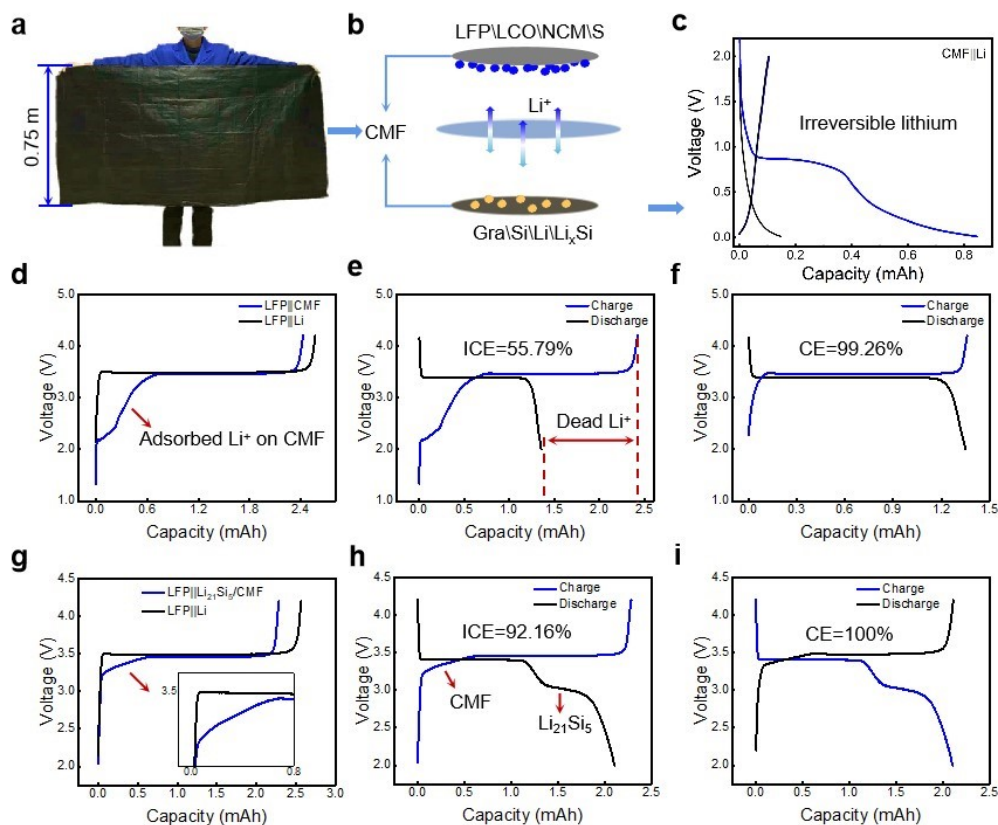

Supplementary Figure 10. Application of  $\text{Li}_{21}\text{Si}_5$  in carbon-based collectors. a, photograph of carbon nanotube macroscopic film (CMF). b, schematic diagram of CMF as a collector. c, irreversible lithium embedding phenomenon of CMF as an anode collector. d, charging curve of LFP||CMF cell and LFP||Li cell. e, first charge/discharge curve of LFP||CMF cell. f, second turn discharge curve of LFP||CMF cell. g, charging curve of LFP||CMF/ $\text{Li}_{21}\text{Si}_5$  cell and LFP||Li cell. h, first charge/discharge curve of LFP||CMF/ $\text{Li}_{21}\text{Si}_5$  cell. i, second turn discharge curve of LFP||CMF/ $\text{Li}_{21}\text{Si}_5$  cell.
